# Supplementary material for: Hybrid Passivated Red Organic LEDs with Prolonged Operation and Storage Lifetime
Source: MDPI journal article supplement (doi:10.3390/molecules27092607), 2022-04-19
Supplement: s1 [file s1]

# Hybrid Passivated Red Organic LEDs with Prolonged Operation and Storage Lifetime

Dan-Dan Feng <sup>1</sup>, Shuang-Qiao Sun <sup>1</sup>, Wei He <sup>1</sup>, Jun Wang <sup>2</sup>, Xiao-Bo Shi <sup>2</sup> and Man-Keung Fung <sup>1,2,3,\*</sup>

<sup>1</sup> Institute of Functional Nano & Soft Materials (FUNSOM), Jiangsu Key Laboratory for Carbon-Based Functional Materials & Devices, Soochow University, Suzhou 215123, China; change071125@163.com (D.-D.F.); 20214014016@stu.suda.edu.cn (S.-Q.S.); 20204014026@stu.suda.edu.cn (W.H.)

<sup>2</sup> Institute of Organic Optoelectronics, Jiangsu Industrial Technology Research Institute (JITRI), Wujiang, Suzhou 215123, China; wangj@jitrioo.com (J.W.); shixb@jitrioo.com (X.-B.S.)

<sup>3</sup> Macao Institute of Materials Science and Engineering (MIMSE), MUST-SUDA Joint Research Center for Advanced Functional Materials, Zhuhai MUST Science and Technology Research Institute, Macau University of Science and Technology, Macau 999078, China

\* Correspondence: mkfung@suda.edu.cn

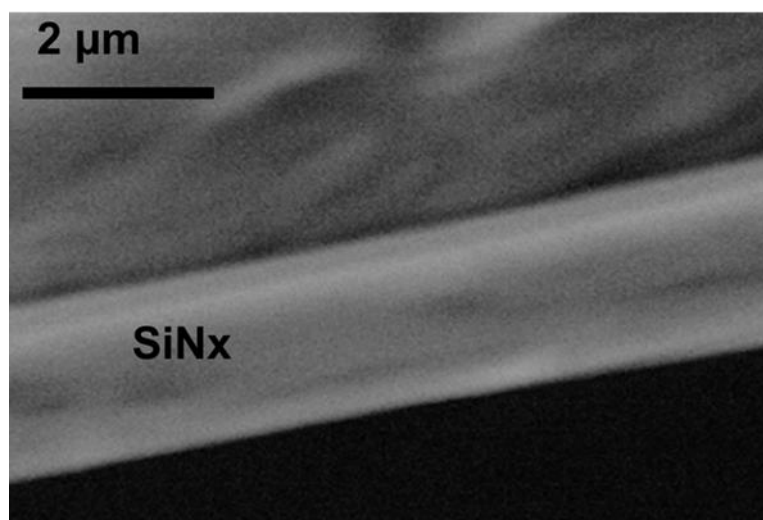

**Figure S1.** Cross-sectional SEM image of a 2  $\mu\text{m}$  thick  $\text{Si}_x\text{N}_y$  encapsulation film.

**Table S1.** Residual stress of  $\text{Si}_x\text{N}_y$  and  $\text{Si}_x\text{N}_y/\text{Al}$  measured in different film preparation conditions.

| Flim Type                         |                                              | Stress(MPa)                   |       |       |       |       |       |       |
|-----------------------------------|----------------------------------------------|-------------------------------|-------|-------|-------|-------|-------|-------|
| $\text{Si}_x\text{N}_y$           | Deposition Temperature( $^{\circ}\text{C}$ ) | 55                            | 65    | 75    | 80    | 85    | 90    | 95    |
|                                   |                                              | -178.3                        | -88.5 | -47.3 | -35.0 | -23.2 | -28.4 | -30.1 |
|                                   | Thickness( $\mu\text{m}$ )                   | 0.5                           | 1     | 1.5   | 2     | 2.5   |       |       |
|                                   |                                              | -25.7                         | -12.6 | -19.7 | -23.2 | -46.4 |       |       |
| Al                                | Thickness(nm)                                | 100                           | 200   | 300   | 400   | 500   |       |       |
|                                   |                                              | 5.4                           | 10.3  | 21.1  | 45.1  | 57.2  |       |       |
| $\text{Si}_x\text{N}_y/\text{Al}$ |                                              | 2 $\mu\text{m}/300\text{ nm}$ |       |       |       |       |       |       |
|                                   |                                              | -1.0                          |       |       |       |       |       |       |

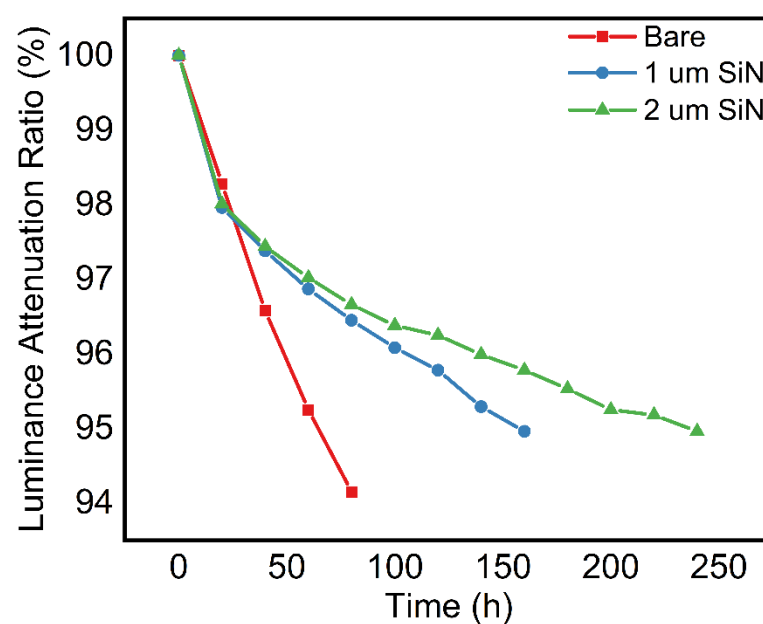

**Figure S2.** Operation lifetime of devices without any encapsulation and encapsulated with 1 $\mu\text{m}$  and 2 $\mu\text{m}$  thick  $\text{Si}_x\text{N}_y$ . All devices were driven at a current density of 50  $\text{mA}/\text{cm}^2$ .

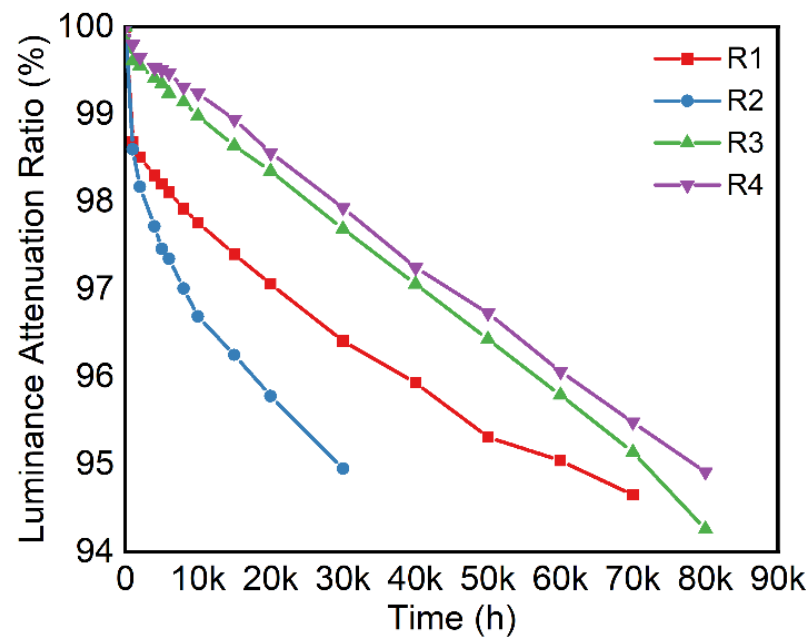

**Figure S3.**  $T_{95}$  operation lifetime at a luminance of 1000 cd/m<sup>2</sup>.

**Table S2.** Luminous surface of a bare device without encapsulation and a device solely encapsulated with a glass cover under the 85/85 test.

| Type        | Fresh                                                                               | 5 h                                                                                 | 20 h                                                                                 | 50 h |
|-------------|-------------------------------------------------------------------------------------|-------------------------------------------------------------------------------------|--------------------------------------------------------------------------------------|------|
| Bare        |  | ---                                                                                 |                                                                                      |      |
| Glass cover |  |  |  | ---  |
